# Supplementary material
Source: Springer Nature journal article supplement (https://www.springermedizin.de/resource/supplementary/12913_2013_2970_MOESM3_ESM.pdf/9532474)

## Drivers

- Government policies (new service models)
- Service demand
- Complaints

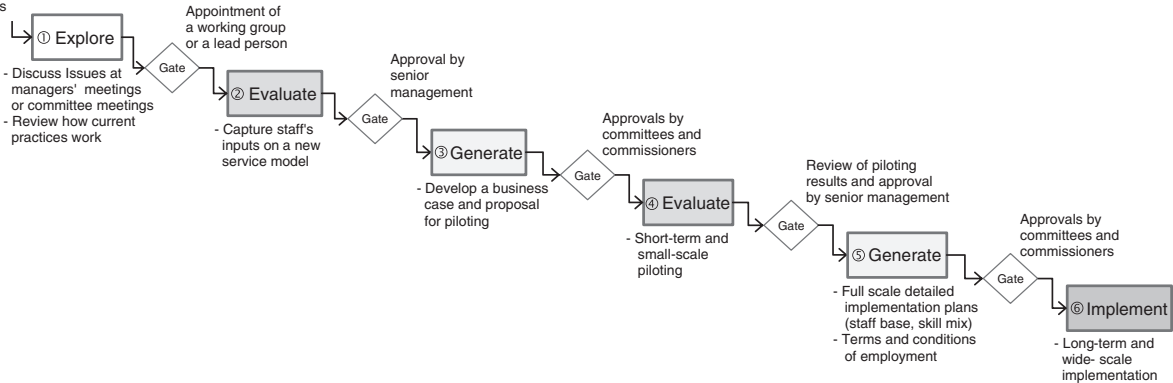

Supplement: MOESM3 [file 9532474]
